# Supplementary material for: An anionic Na(i)–organic framework platform: separation of organic dyes and post-modification for highly sensitive detection of picric acid
Source: Royal Society of Chemistry journal article supplement (doi:10.1039/c7cc06073d), 2017-01-01
Supplement: c7cc06073d1.pdf [file c7cc06073d1.pdf]

***Electronic Supplementary Information***

**An anionic Na(I)–organic framework platform: separation of organic dyes  
and post-modification for highly sensitive detection of picric acid**

**Di-Ming Chen, Jia-Yue Tian, Zhuo-Wei Wang, Chun-Sen Liu,\* Min Chen and Miao Du\***

*Henan Provincial Key Laboratory of Surface & Interface Science, Zhengzhou University of Light Industry,  
Zhengzhou 450002, P. R. China*

E-mail: dumiao@zzuli.edu.cn; chunsenliu@zzuli.edu.cn

***Chem. Commun.***

## Experimental details

**Materials and methods.** All chemicals of reagent grade were purchased and used without further purification. Analyses for C, H, and N were taken on a Perkin-Elmer 240 CHN elemental analyzer. IR was recorded in the range of 400–4000  $\text{cm}^{-1}$  on a Bruker TENOR 27 spectrophotometer. Powder X-ray diffraction (PXRD) was carried out on a Rigaku D/Max-2500 X-ray diffractometer with Cu  $K\alpha$  radiation. Thermogravimetric analysis (TGA) was performed on a Labsys NETZSCH TG 209 Setaram apparatus with a heating rate of 10  $^{\circ}\text{C}/\text{min}$  in nitrogen atmosphere. Fluorescent spectra were obtained on an Agilent fluorescence spectrophotometer.

**Preparation of  $\{(\text{Me}_2\text{NH}_2^+)_5[\text{Na}_{31}(\text{TATB})_{12}](\text{DMF})_{25}(\text{H}_2\text{O})_{67}\}_n$  (**1**).** A mixture of  $\text{H}_3\text{TATB}$  (0.06 g, 0.16 mmol),  $\text{NaAlO}_2$  (0.032 g, 0.4 mmol), and  $\text{HN}(\text{CH}_3)_2$  (40%, aq) was dissolved in DMF (4 mL) in a screw-capped vial, which was heated at 100  $^{\circ}\text{C}$  for 96 h under autogenous pressure. Light yellow polyhedral crystals were produced after filtration, washed with DMF. Yield: 45% based on  $\text{H}_3\text{TATB}$  ligand. Elemental analysis (%) found (calcd) for:  $\text{C}_{372}\text{H}_{493}\text{Na}_{31}\text{N}_{66}\text{O}_{164}$ : C, 48.43 (48.76); H, 5.39 (5.01); N, 10.02 (10.67). IR (KBr,  $\text{cm}^{-1}$ ): 3416(br), 1667(m), 1601(m), 1564(vs), 1518(m), 1357(vs), 1100(w), 1016(m), 883(w), 822(m), 777(w), 701(w), 492(w).

**Preparation of  $\{(\text{Rh6G})(\text{Me}_2\text{NH}_2^+)_4[\text{Na}_{31}(\text{TATB})_{12}](\text{DMF})_{29}(\text{H}_2\text{O})_{69}\}_n$  (**Rh6G@1**).** A fresh sample of **1** (20 mg) was soaked into a DMF solution (10 mL) of Rh6G (0.1 mol/L) for two days, during which the dye solution was exchanged every 12 hours. After that, the solution was filtrated and washed with DMF solvent until no Rh6G could be detected in the filtrate (as monitored by UV-vis spectra). Elemental analysis (%) found (calcd) for  $\text{C}_{383}\text{H}_{517}\text{N}_{69}\text{Na}_{31}\text{O}_{170}$ : C, 46.69 (48.32); H, 5.14 (5.47); N, 10.33 (10.15). The TGA plot for **Rh6G@1** resembles that of **1** with a 35.2% weight loss from room temperature to 460  $^{\circ}\text{C}$  (Fig. S7), which reveals the exclusion of 29 DMF, 69 water, and 4  $\text{HNMe}_2^+$  (calcd: 35.9%).

**X-ray crystallography.** Data were collected on an Agilent Technologies SuperNova Single Crystal Diffractometer equipped with graphite-monochromatic Cu  $K\alpha$  radiation ( $\lambda = 1.54184 \text{ \AA}$ ). The structure was solved by SHELXS (direct methods) and refined by SHELXL (full matrix least-squares techniques) in the Olex2 package. All non-hydrogen atoms were refined with anisotropic displacement parameters. Hydrogen atoms attached to carbon were placed in geometrically idealized posi-

tions and refined with a riding model. For the highly disordered nature of lattice guests, they could not be finely made out in the refinement, and thus the SQUEEZE routine of PLATON was applied to remove the diffraction contributed from the highly disordered guests. The chemical formula was determined by the combination of the crystal data, TGA result, and elemental analysis.

**Table S1** Crystal data and structure refinement for **1**.

|                                                               |                                                                                     |
|---------------------------------------------------------------|-------------------------------------------------------------------------------------|
| Empirical formula                                             | C <sub>388</sub> H <sub>578</sub> Na <sub>31</sub> N <sub>71</sub> O <sub>194</sub> |
| Formula weight                                                | 10053.9                                                                             |
| Temperature / K                                               | 293(2)                                                                              |
| Crystal system                                                | Cubic                                                                               |
| Space group                                                   | <i>F</i> -43c                                                                       |
| <i>a</i> / Å                                                  | 48.1642(8)                                                                          |
| <i>b</i> / Å                                                  | 48.1642(8)                                                                          |
| <i>c</i> / Å                                                  | 48.1642(8)                                                                          |
| $\alpha$ /°                                                   | 90                                                                                  |
| $\beta$ /°                                                    | 90                                                                                  |
| $\gamma$ /°                                                   | 90                                                                                  |
| Volume / Å <sup>3</sup>                                       | 111731(5)                                                                           |
| <i>Z</i>                                                      | 8                                                                                   |
| $\rho_{\text{calc}}$ / g cm <sup>3</sup>                      | 0.710                                                                               |
| $\mu$ / mm <sup>-1</sup>                                      | 0.640                                                                               |
| <i>F</i> (000)                                                | 24328.0                                                                             |
| Crystal size / mm <sup>3</sup>                                | 0.4 × 0.2 × 0.2                                                                     |
| Radiation                                                     | Cu K $\alpha$ ( $\lambda$ = 1.54184)                                                |
| Reflections collected                                         | 15687                                                                               |
| Independent reflections                                       | 7387 [ <i>R</i> <sub>int</sub> = 0.0604, <i>R</i> <sub>sigma</sub> = 0.0594]        |
| Data/restraints/parameters                                    | 7387/25/322                                                                         |
| Goodness-of-fit on <i>F</i> <sup>2</sup>                      | 0.868                                                                               |
| Final <i>R</i> indexes [ <i>I</i> >= 2 $\sigma$ ( <i>I</i> )] | <i>R</i> <sub>1</sub> = 0.0954, w <i>R</i> <sub>2</sub> = 0.2603                    |
| Final <i>R</i> indexes (all data)                             | <i>R</i> <sub>1</sub> = 0.1252, w <i>R</i> <sub>2</sub> = 0.2877                    |
| Largest diff. peak and hole / e Å <sup>-3</sup>               | 0.41 and -0.26                                                                      |

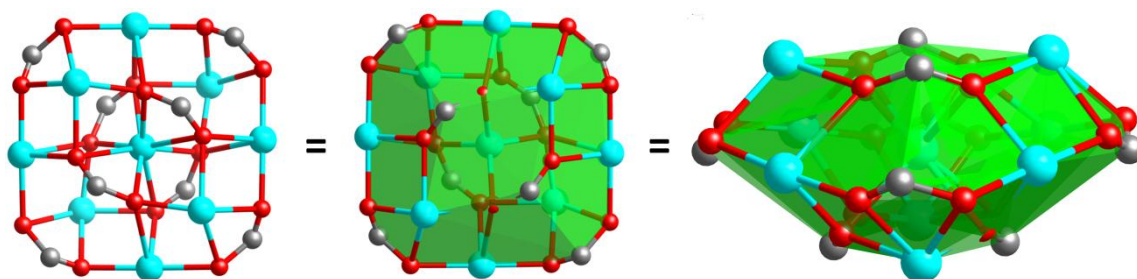

**Fig. S1** The diamond-like nine nuclear Na(I)-based SBU in **1**.

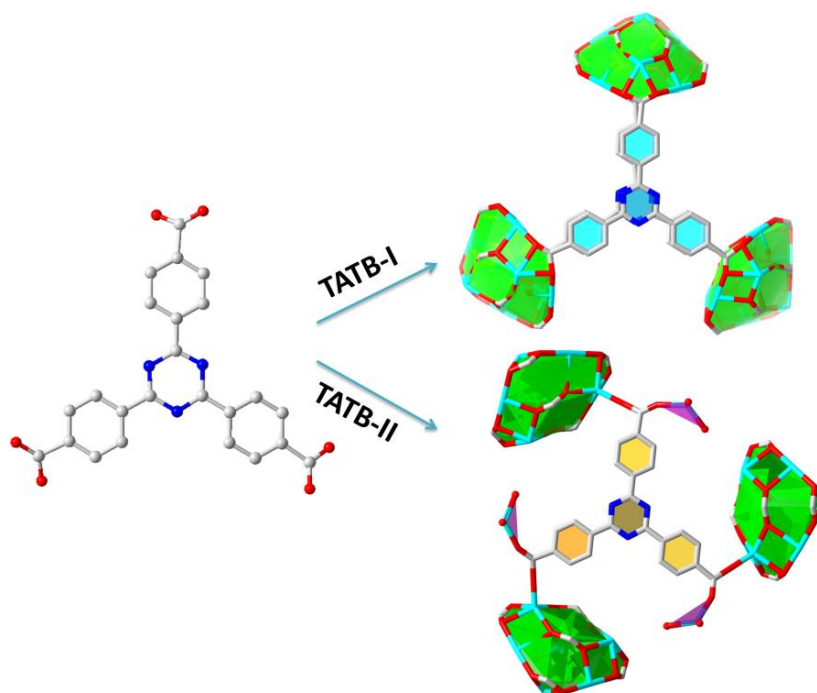

**Fig. S2** Two different types of connection modes for the TATB<sup>3-</sup> ligands.

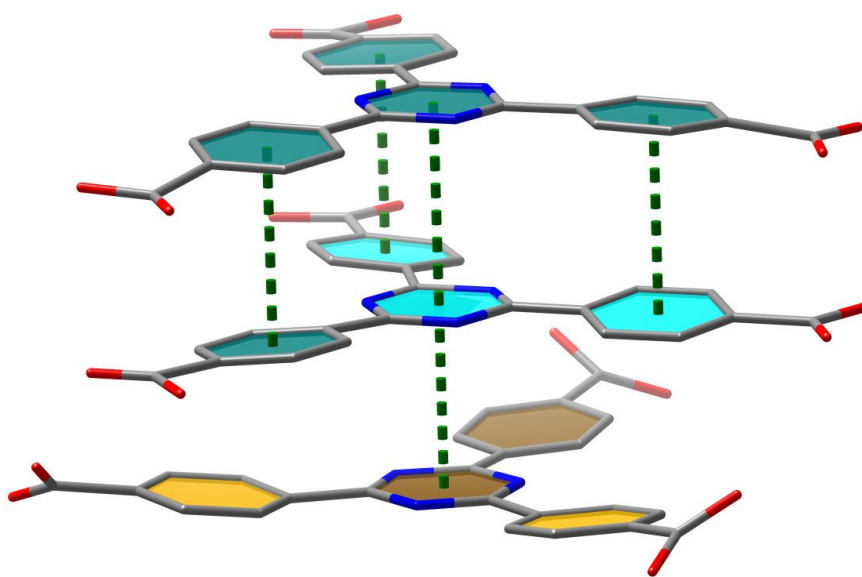

**Fig. S3** The tightly packed TATB<sup>3-</sup> ligands in the crystal lattice of **1**.

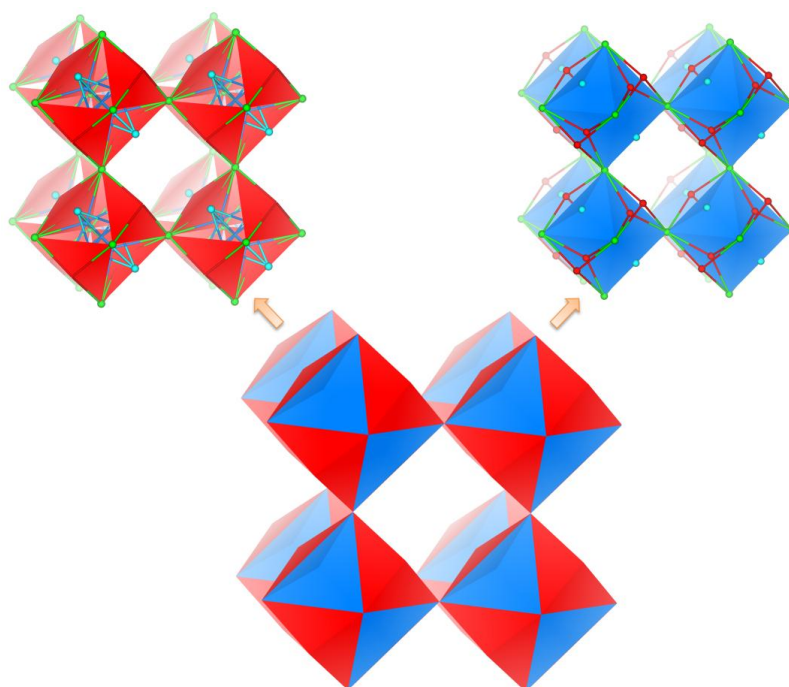

**Fig. S4** View of the formation of the cages.

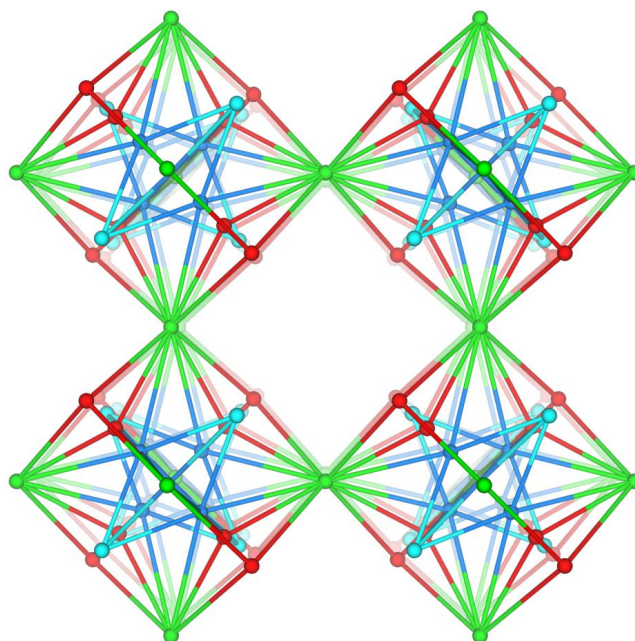

**Fig. S5** The (3,6,12)-connected topological network for **1**.

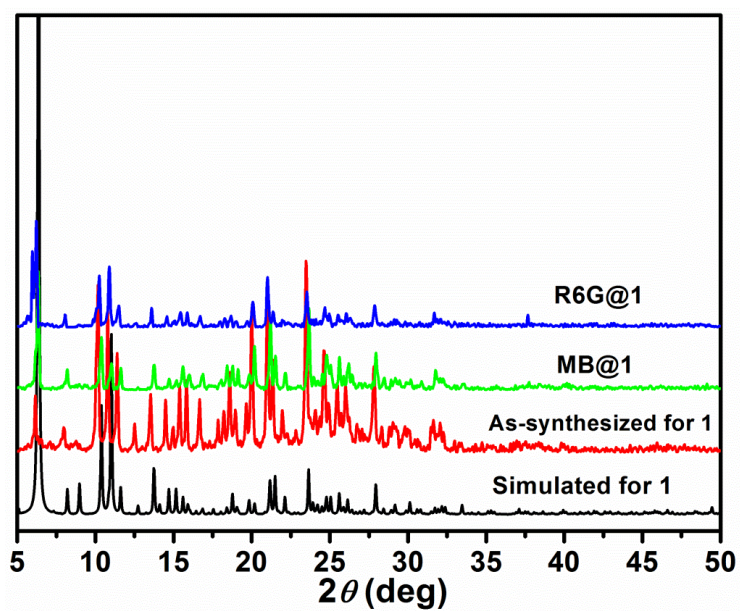

**Fig. S6** PXRD patterns for **1**, **MB@1**, and **R6G@1**.

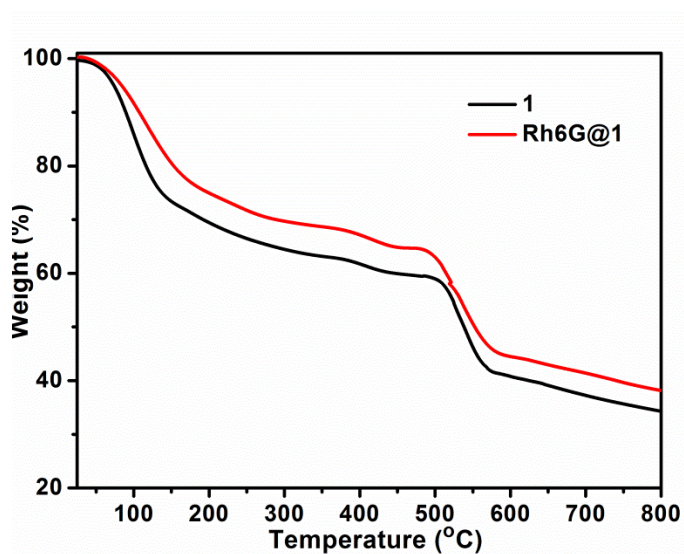

**Fig. S7** The TGA curves for **1** and **Rh6G@1**.

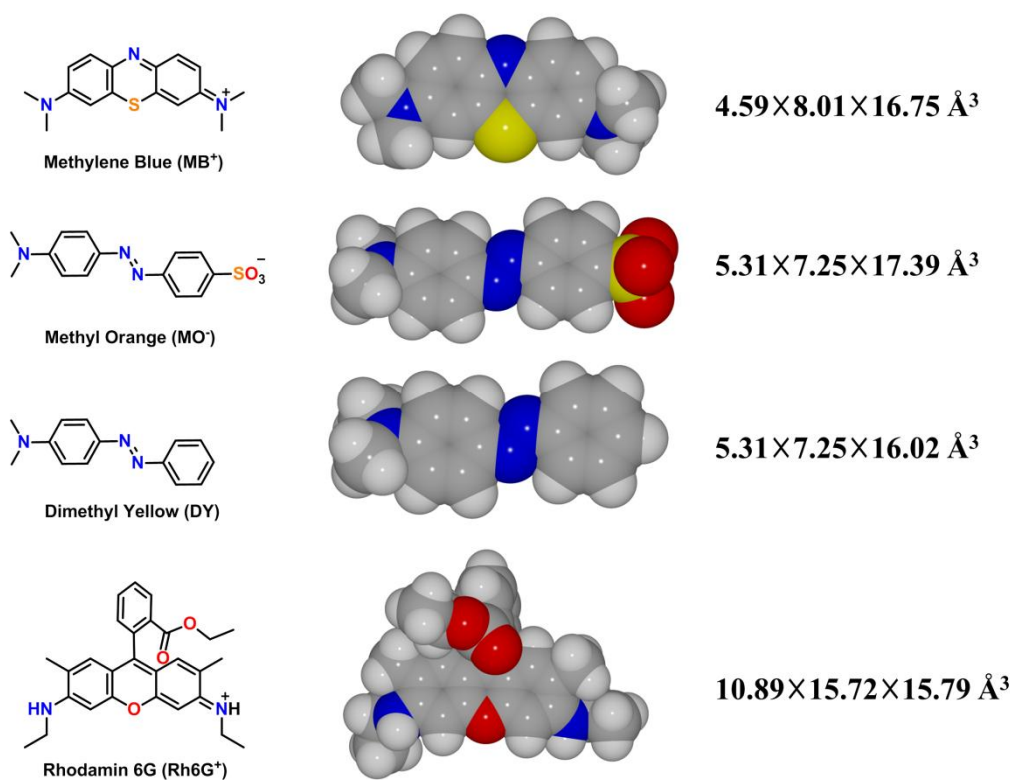

**Fig. S8** The molecular structures and sizes of organic dyes (the molecular sizes of the dyes were derived from their geometry optimized structures in Forcite plus using the scale bar tool in the Material Studio software)

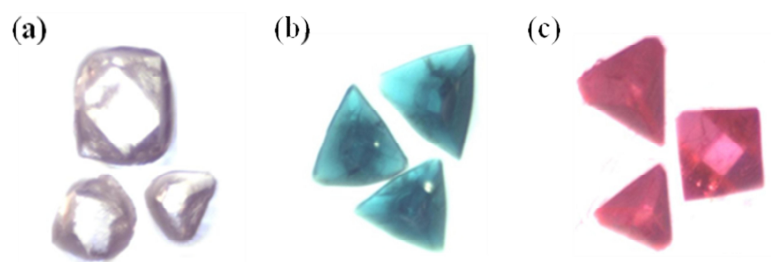

**Fig. S9** The color changes of the crystals for **1** before (a) and after dye uptake (b: MB and c: Rh6G).

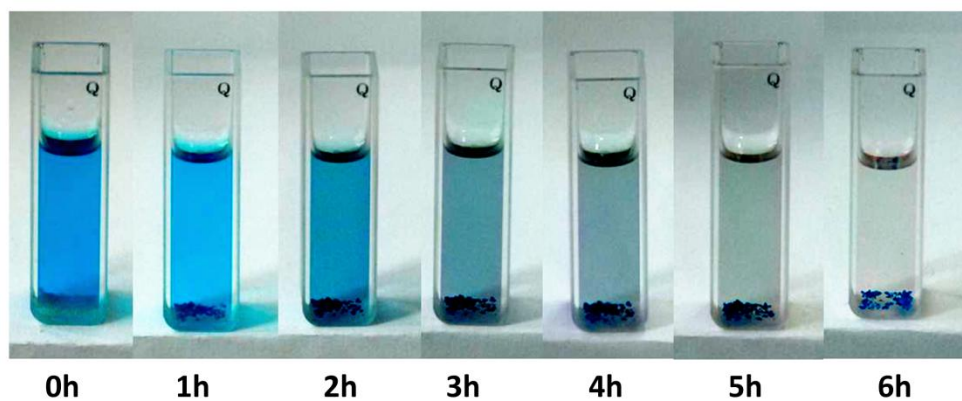

**Fig. S10** The time dependent color change for the DMF solution of MB in the presence of **1**.

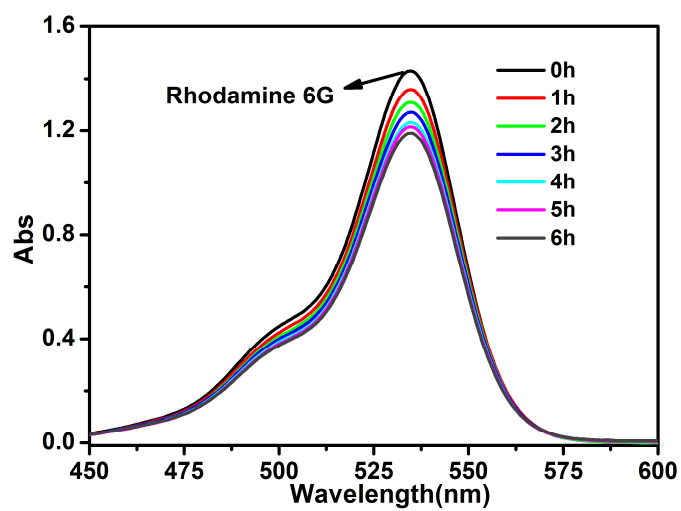

**Fig. S11** Time-dependent UV-vis absorption spectra of Rh6G.

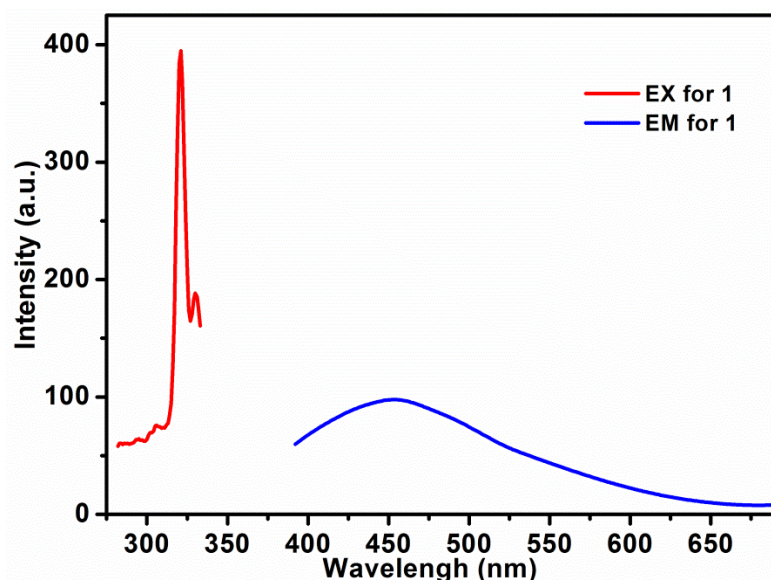

**Fig. S12** Solid state excitation (red at 450 nm) and emission (blue at 320 nm) spectra of **1**.

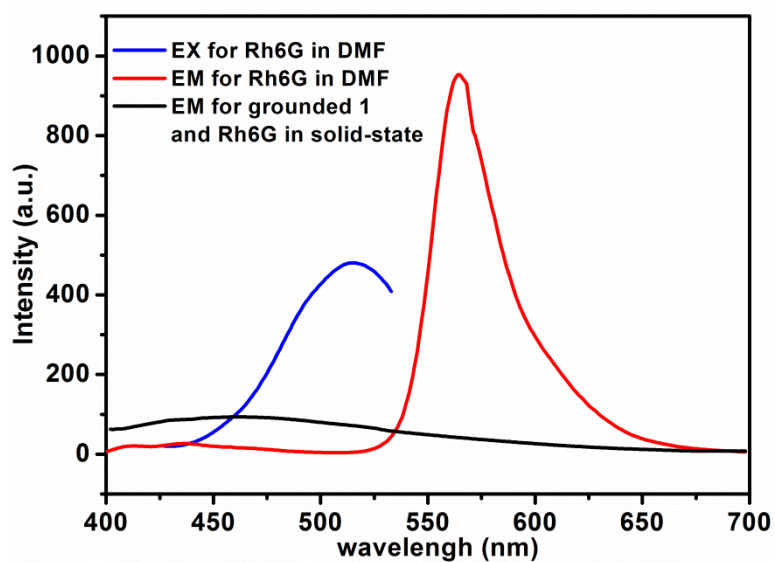

**Fig. S13** Excitation (red at 450 nm) and emission (blue at 320 nm) spectra of Rh6G in DMF as well as the solid state emission (black at 320 nm) spectrum for the mixture of **1** and Rh6G.

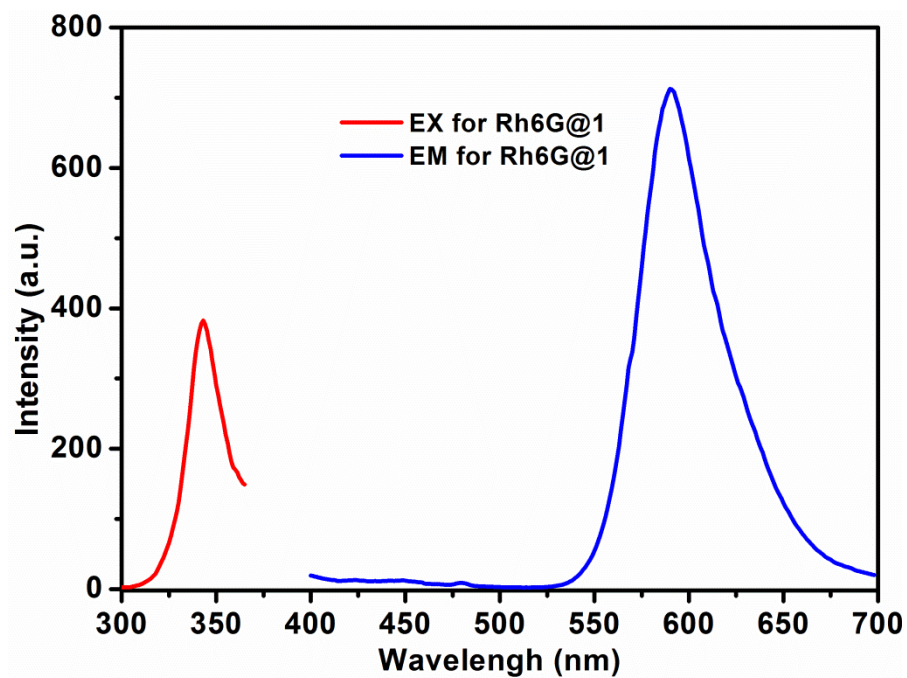

**Fig. S14** Solid state excitation (red at 590 nm) and emission (blue at 338 nm) spectra of **Rh6G@1**.

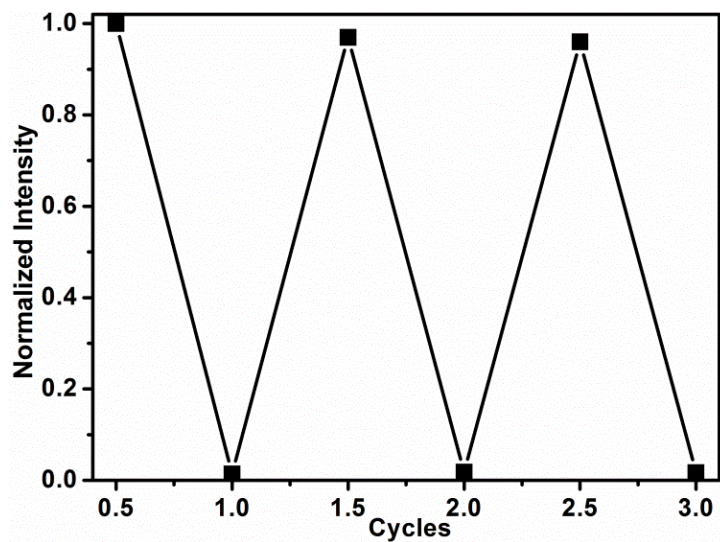

**Fig. S15** The quenching and recovery test of **Rh6G@1**. The dots above and below are the initial luminescent intensity and the intensity upon adding 100 ppm DMF solution of PA.

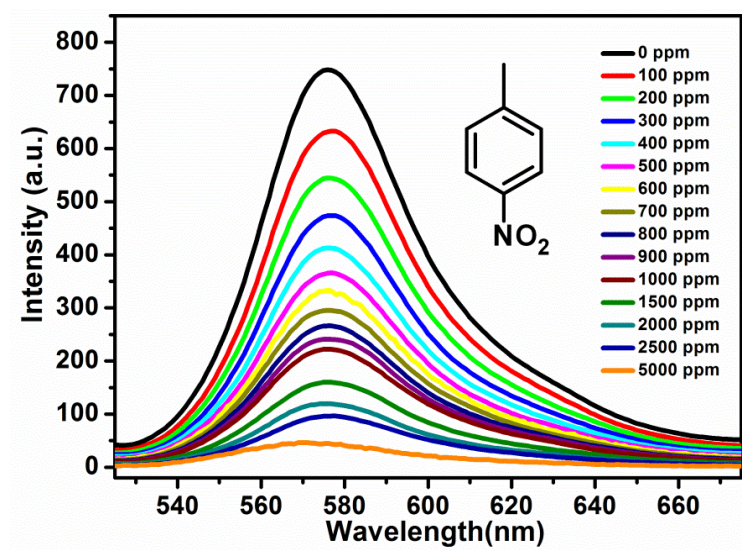

**Fig. S16** Emission spectra of **Rh6G@1** upon the addition of *p*-nitrotoluene.

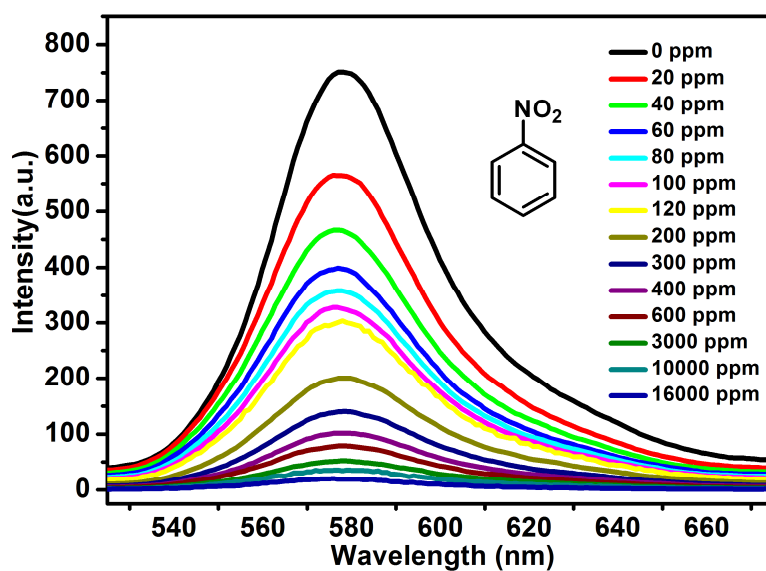

**Fig. S17** Emission spectra of **Rh6G@1** upon the addition of nitrobenzene.

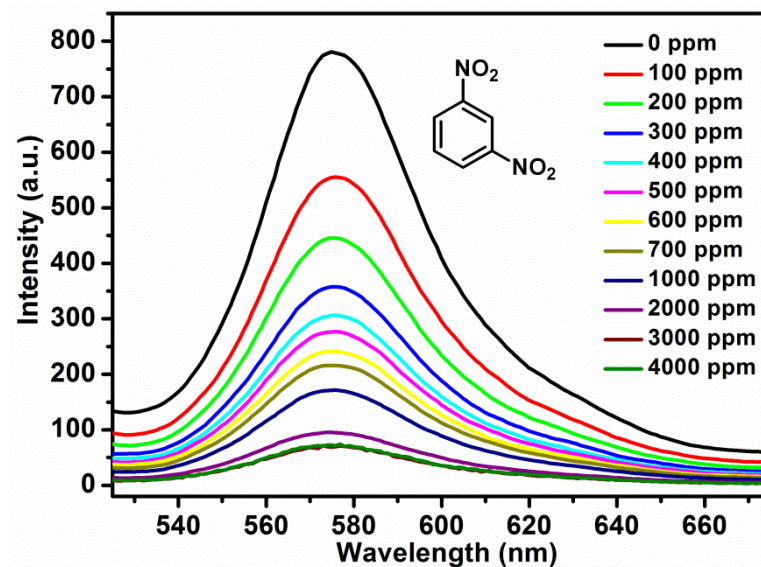

**Fig. S18** Emission spectra of **Rh6G@1** upon the addition of *m*-dinitrobenzene.

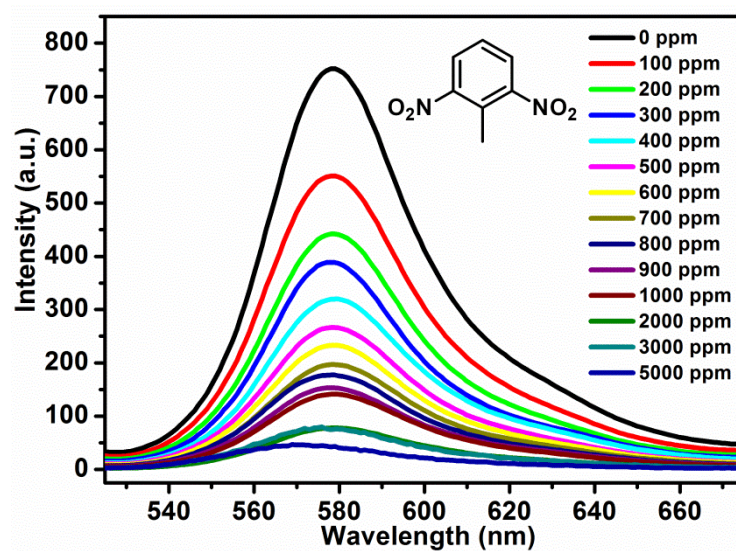

**Fig. S19** Emission spectra of **Rh6G@1** upon the addition of 2,6-dinitrotoluene.

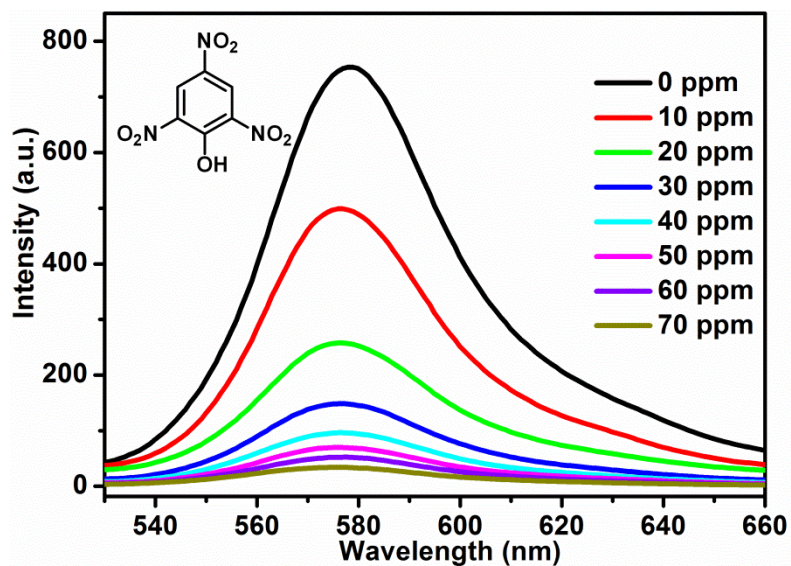

Fig. S20 Emission spectra of **Rh6G@1** upon the addition of PA.

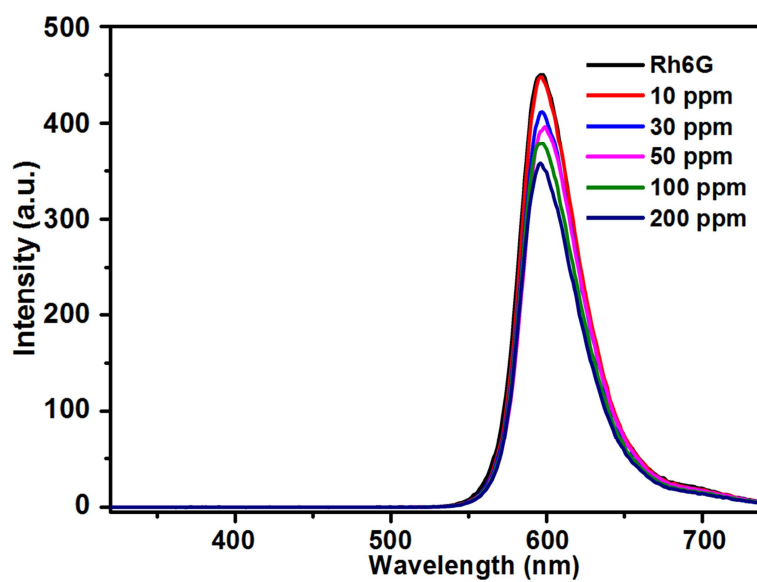

Fig. S21 Emission spectra of **Rh6G** upon the addition of PA.

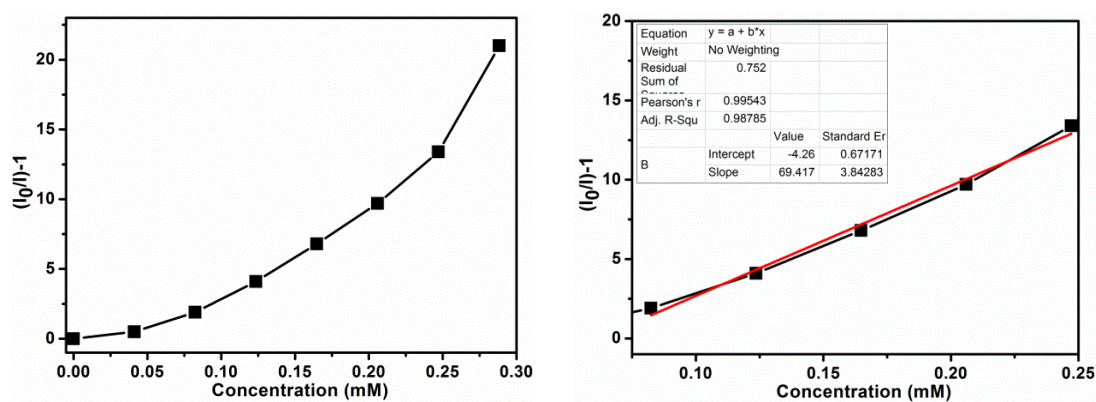

**Fig. S22** Stern-Volmer plot for the fluorescence quenching of **Rh6G@1** upon addition of PA (left) and Stern-Volmer plot at low PA concentrations (right).

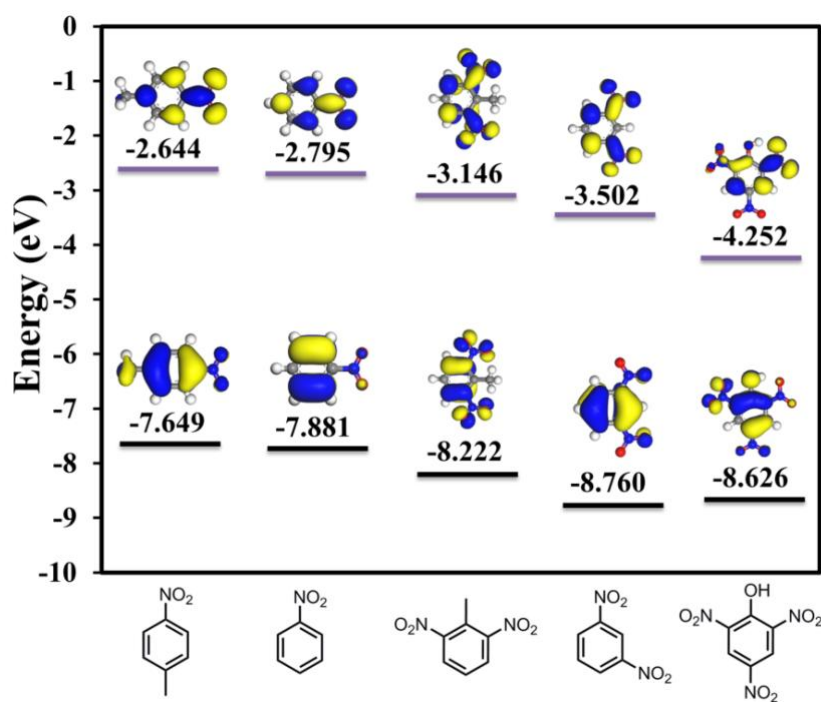

**Fig. S23** The DFT calculated HOMO and LUMO energies of the nitro analytes at the B3LYP/6-31G\* level.

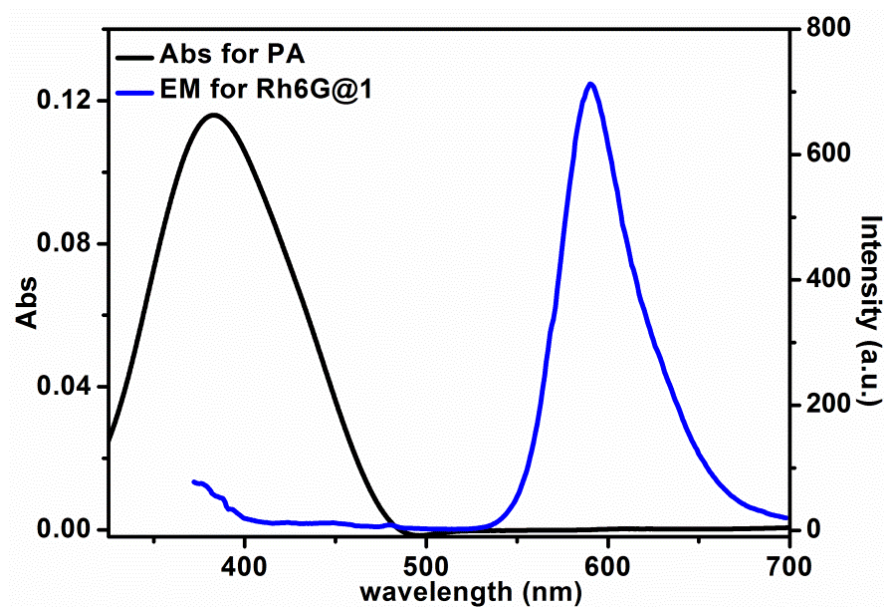

**Fig. S24** Comparison of the emission spectrum of **Rh6G@1** and absorption spectrum of PA.
